# Supplementary material for: Associations between Combined Psychological and Lifestyle Factors with Pain Intensity and/or Disability in Patients with Chronic Low Back Pain: A Cross-Sectional Study
Source: MDPI journal article supplement (doi:10.3390/healthcare11222928), 2023-11-09
Supplement: s1 [file s1]

**Table S1.** Demographic and medical characteristics of participants with chronic low back pain (CLBP) and controls in the male population.

| Characteristic                                  | Total<br>(n=164) | Controls<br>(n=68) | CLBP<br>(n=96) | P-Value |
|-------------------------------------------------|------------------|--------------------|----------------|---------|
| <b>Age</b>                                      |                  |                    |                |         |
| Age, years                                      | 58 ± 15          | 49 ± 13            | 65± 12         | <0.001  |
| Age group 18-49 years                           | 37 (22%)         | 27 (40%)           | 10 (10%)       |         |
| Age group 50-64 years                           | 57 (35%)         | 34 (50%)           | 23 (24%)       |         |
| Age group ≥ 65 years                            | 70 (43%)         | 7 (10%)            | 63 (66%)       | <0.001  |
| <b>BMI</b>                                      | 28 ± 3           | 28 ± 4             | 28 ± 3         | 0.144   |
| >30 kg/m2                                       | 32 (20%)         | 14 (22%)           | 18 (20%)       | 0.664   |
| <b>Smoking status</b>                           |                  |                    |                |         |
| Current                                         | 68 (42%)         | 26 (38%)           | 42 (44%)       |         |
| Never/Former smoker                             | 96 (58%)         | 42 (62%)           | 54 (56%)       | 0.480   |
| <b>Frequent Alcohol use</b><br>(≥1 drink/day)   | 42 (26%)         | 6 (9%)             | 36 (38%)       | <0.001  |
| <b>Physical activity</b>                        |                  |                    |                |         |
| Yes (at least 1/week)                           | 47 (29%)         | 23 (34%)           | 24 (25%)       |         |
| No                                              | 117 (71%)        | 45 (66%)           | 72 (75%)       | 0.218   |
| <b>Level of education</b>                       |                  |                    |                |         |
| Primary level or less                           | 43 (26%)         | 17 (25%)           | 26 (27%)       |         |
| Secondary level                                 | 42 (26%)         | 12 (18%)           | 30 (31%)       |         |
| Higher level                                    | 79 (48%)         | 39 (57%)           | 40 (42 %)      | 0.083   |
| <b>Occupational status</b>                      |                  |                    |                |         |
| Unemployed                                      | 34 (21%)         | 2 (3%)             | 32 (35%)       |         |
| Employed                                        | 101 (64%)        | 64 (95%)           | 37 (40%)       |         |
| Retired                                         | 24 (15%)         | 1 (2%)             | 23 (25%)       | <0.001  |
| <b>Manual work</b>                              | 64 (40%)         | 30 (46%)           | 34 (36%)       | 0.218   |
| <b>Marital Status</b>                           |                  |                    |                |         |
| Married/Partner                                 | 122 (74%)        | 47 (69%)           | 75 (78%)       |         |
| Unmarried/divorced/widowed                      | 42 (26%)         | 21 (31%)           | 21 (22%)       | 0.193   |
| <b>Living arrangements</b>                      |                  |                    |                |         |
| Living alone                                    | 41 (25%)         | 17 (25%)           | 24 (25%)       |         |
| Living with others                              | 123 (75%)        | 51 (75%)           | 72 (75%)       | 0.999   |
| <b>Co-morbidities</b>                           |                  |                    |                |         |
| Arterial Hypertension                           | 76 (47%)         | 15 (22%)           | 61 (65%)       | <0.001  |
| COPD                                            | 13 (8%)          | 2 (3%)             | 11 (12%)       | 0.045   |
| Diabetes Type 2                                 | 35 (22%)         | 7 (10%)            | 28 (30%)       | 0.003   |
| Chronic cerebrovascular disease                 | 1 (1%)           | 0 (0%)             | 1 (1%)         | 0.367   |
| Coronary artery disease                         | 19 (12%)         | 11 (16%)           | 8 (9%)         | 0.125   |
| Congestive heart failure                        | 7 (4%)           | 3 (5%)             | 4 (4%)         | 0.957   |
| Depression (on medication)                      | 23 (14%)         | 3 (5%)             | 20 (21%)       | 0.003   |
| <b>Comorbid musculoskeletal pain conditions</b> | 33 (24%)         | 11 (17%)           | 22 (29%)       | 0.084   |

**Table S2.** Demographic and medical characteristics of participants with chronic low back pain (CLBP) and controls in the female population.

| Characteristic                                  | Total<br>(n=205) | Controls<br>(n=48) | CLBP<br>(n=157) | P-Value |
|-------------------------------------------------|------------------|--------------------|-----------------|---------|
| <b>Age</b>                                      |                  |                    |                 |         |
| Age, years                                      | 55 ± 15          | 54 ± 12            | 56 ± 16         | 0.332   |
| Age group 18-49 years                           | 84 (41%)         | 19 (39%)           | 65 (41%)        |         |
| Age group 50-64 years                           | 63 (31%)         | 20 (42%)           | 43 (28%)        |         |
| Age group ≥ 65 years                            | 58 (28%)         | 9 (19%)            | 49 (31%)        | 0.106   |
| <b>BMI</b>                                      | 28 ± 5           | 28 ± 5             | 28 ± 5          | 0.860   |
| >30 kg/m2                                       | 56 (28%)         | 16 (36%)           | 40 (26%)        | 0.183   |
| <b>Smoking status</b>                           |                  |                    |                 |         |
| Current                                         | 75 (37%)         | 19 (40%)           | 56 (36%)        |         |
| Never/Former smoker                             | 130 (63%)        | 29 (60%)           | 101 (64%)       | 0.622   |
| <b>Frequent Alcohol use</b><br>(≥1 drink/day)   | 32 (16%)         | 7 (15%)            | 25 (16%)        | 0.823   |
| <b>Physical activity</b>                        |                  |                    |                 |         |
| Yes (at least 1/week)                           | 64 (31%)         | 24 (50%)           | 40 (26%)        |         |
| No                                              | 141 (69%)        | 24 (50%)           | 117 (74%)       | 0.001   |
| <b>Level of education</b>                       |                  |                    |                 |         |
| Primary level or less                           | 48 (23%)         | 10 (21%)           | 38 (24%)        |         |
| Secondary level                                 | 84 (41%)         | 20 (42%)           | 64 (41%)        |         |
| Higher level                                    | 73 (36%)         | 18 (38%)           | 55 (35%)        | 0.883   |
| <b>Occupational status</b>                      |                  |                    |                 |         |
| Unemployed                                      | 52 (33%)         | 15 (35%)           | 37 (33%)        |         |
| Employed                                        | 85 (55%)         | 23 (55%)           | 62 (54%)        |         |
| Retired                                         | 19 (12%)         | 4 (10%)            | 15 (13%)        | 0.806   |
| <b>Manual work</b>                              | 56 (31%)         | 17 (39%)           | 39 (29%)        | 0.226   |
| <b>Marital Status</b>                           |                  |                    |                 |         |
| Married/Partner                                 | 132 (64%)        | 35 (73%)           | 97 (62%)        | 0.159   |
| Unmarried/divorced/widowed                      | 73 (36%)         | 13 (27%)           | 60 (38%)        |         |
| <b>Living arrangements</b>                      |                  |                    |                 |         |
| Living alone                                    | 29 (14%)         | 5 (10%)            | 24 (15%)        |         |
| Living with others                              | 176 (86%)        | 43 (90%)           | 133 (85%)       | 0.397   |
| <b>Co-morbidities</b>                           |                  |                    |                 |         |
| Arterial Hypertension                           | 65 (33%)         | 13 (27%)           | 52 (35%)        | <0.001  |
| COPD                                            | 7 (4%)           | 0 (0%)             | 7 (5%)          | 0.126   |
| Diabetes Type 2                                 | 38 (19%)         | 6 (13%)            | 32 (22%)        | 0.170   |
| Chronic cerebrovascular disease                 | 9 (5%)           | 0 (0%)             | 9 (7%)          | 0.062   |
| Coronary artery disease                         | 17 (9%)          | 3 (6%)             | 14 (9%)         | 0.500   |
| Congestive heart failure                        | 8 (4%)           | 2 (4%)             | 6 (4%)          | 0.966   |
| Depression (on medication)                      | 50 (27%)         | 4 (8%)             | 46 (33%)        | <0.001  |
| <b>Comorbid musculoskeletal pain conditions</b> | 51 (32%)         | 5 (11%)            | 46 (40%)        | <0.001  |

**Table S3.** Summary of scores of pain, psychological and subjective sleep variables by diagnostic group in the male population.

| Characteristic                                |                      | Total<br>(n=164) | Controls<br>(n=68) | CLBP<br>(n=96) | P-Value |
|-----------------------------------------------|----------------------|------------------|--------------------|----------------|---------|
| Variables                                     | Measures             |                  |                    |                |         |
| Pain Intensity                                | VAS                  | 3.7 ± 2.0        | 2.6 ± 1.7          | 4.4 ± 1.9      | <0.001  |
|                                               | VAS≥6                | 38 (24%)         | 8 (12%)            | 30 (33%)       | <0.001  |
| Low back pain-related disability              | QBPDs                | 28 (4, 48)       | 4 (0, 14)          | 41 (29, 58)    | <0.001  |
|                                               | QBPDs≥50             | 31 (19%)         | 0 (0%)             | 31 (33%)       | <0.001  |
| Effect of pain on                             |                      |                  |                    |                |         |
| Mobility                                      | Minor /major problem | 89 (56%)         | 16 (24%)           | 73 (79%)       | <0.001  |
| Self-reliant                                  | Minor /major problem | 43 (27%)         | 7 (10%)            | 36 (38%)       | <0.001  |
| Usual activity                                | Minor /major problem | 75 (47%)         | 12 (18%)           | 63 (67%)       | <0.001  |
| Pain/Discomfort                               | Minor /major problem | 138 (86%)        | 46 (69%)           | 92 (98%)       | <0.001  |
| Anxiety/depression                            | Minor /major problem | 128 (80%)        | 45 (67%)           | 83 (88%)       | 0.001   |
| Depression                                    |                      |                  |                    |                |         |
|                                               | SDS                  | 59 ± 8           | 59 ± 7             | 59 ± 9         | 0.834   |
| Normal Range                                  | 25-49                | 8 (5%)           | 5 (7%)             | 3 (3%)         |         |
| Mildly Depressed                              | 50-59                | 85 (53%)         | 31 (46%)           | 54 (57%)       |         |
| Moderately Depressed                          | 60-69                | 45 (28%)         | 25 (37%)           | 20 (21%)       |         |
| Severely Depressed                            | ≥70                  | 24 (15%)         | 7 (10%)            | 17 (18%)       | 0.058   |
| Anxiety                                       |                      |                  |                    |                |         |
|                                               | SAS                  | 64 ± 10          | 66 ± 8             | 63 ± 11        | 0.119   |
| Normal Range                                  | <45                  | 0 (0%)           | 0 (0%)             | 0 (0%)         |         |
| Mild to moderate anxiety levels               | 45-59                | 49 (31%)         | 9 (15%)            | 40 (43%)       |         |
| Marked to severe anxiety levels               | 60-74                | 84 (54%)         | 44 (71%)           | 40 (43%)       |         |
| Extreme anxiety levels                        | ≥75                  | 23 (15%)         | 9 (15%)            | 14 (15%)       | <0.001  |
| Sleep                                         | Insomnia symptoms    | 69 (43%)         | 20 (29%)           | 49 (52%)       | 0.004   |
|                                               | OSA symptoms         | 88 (54%)         | 29 (43%)           | 59 (63%)       | 0.011   |
|                                               | Daytime Sleepiness   | 67 (41%)         | 12 (18%)           | 55 (59%)       | <0.001  |
| SDS≥60 combined with OSA or insomnia symptoms |                      | 40 (25%)         | 12 (18%)           | 28 (30%)       | 0.037   |

VAS: Visual Analogue Scale, QBPDs: Quebec Back Pain Disability Scale, SDS: Zung Self-Rating Depression Scale, SAS: Zung Self-Rating Anxiety Scale.

**Table S4.** Summary of scores of pain, psychological and subjective sleep variables by diagnostic group in the female population.

| Characteristic                                |                      | Total<br>(n=205) | Controls<br>(n=48) | CLBP<br>(n=157) | P-Value |
|-----------------------------------------------|----------------------|------------------|--------------------|-----------------|---------|
| Variables                                     | Measures             |                  |                    |                 |         |
| Pain Intensity                                | VAS                  | 4.7 ± 2.3        | 3.6 ± 1.7          | 4.9 ± 2.3       | <0.001  |
|                                               | VAS≥6                | 75 (38%)         | 9 (20%)            | 66 (43%)        | 0.003   |
| Low back pain-related disability              | QBPDs                | 30 (18, 52)      | 13 (6, 18)         | 43 (23, 60)     | <0.001  |
|                                               | QBPDs≥50             | 56 (29%)         | 0 (0%)             | 56 (38%)        | <0.001  |
| Effect of pain on                             |                      |                  |                    |                 |         |
| Mobility                                      | Minor /major problem | 144 (72%)        | 13 (27%)           | 131 (86%)       | <0.001  |
| Self-reliant                                  | Minor /major problem | 55 (28%)         | 1 (2%)             | 54 (36%)        | <0.001  |
| Usual activity                                | Minor /major problem | 131 (66%)        | 21 (44%)           | 110 (72%)       | <0.001  |
| Pain/Discomfort                               | Minor /major problem | 189 (95%)        | 38 (79%)           | 151 (99%)       | <0.001  |
| Anxiety/depression                            | Minor /major problem | 178 (89%)        | 39 (81%)           | 139 (91%)       | 0.049   |
| Depression                                    |                      |                  |                    |                 |         |
|                                               | SDS                  | 58 ± 10          | 53 ± 14            | 60 ± 8          | <0.001  |
| Normal Range                                  | 25-49                | 12 (6%)          | 4 (9%)             | 8 (5%)          |         |
| Mildly Depressed                              | 50-59                | 104 (53%)        | 28 (62%)           | 76 (50%)        |         |
| Moderately Depressed                          | 60-69                | 59 (30%)         | 11 (24%)           | 48 (32%)        |         |
| Severely Depressed                            | ≥70                  | 22 (11%)         | 2 (4%)             | 20 (13%)        | 0.197   |
| Anxiety                                       |                      |                  |                    |                 |         |
|                                               | SAS                  | 62 ± 7           | 64 ± 6             | 62 ± 8          | 0.052   |
| Normal Range                                  | <45                  | 1 (1%)           | 0 (0%)             | 1 (1%)          |         |
| Mild to moderate anxiety levels               | 45-59                | 59 (30%)         | 9 (19%)            | 50 (34%)        |         |
| Marked to severe anxiety levels               | 60-74                | 129 (67%)        | 38 (79%)           | 91 (62%)        |         |
| Extreme anxiety levels                        | ≥75                  | 5 (3%)           | 1 (2%)             | 4 (3%)          | 0.188   |
| Sleep                                         | Insomnia symptoms    | 122 (60%)        | 10 (22%)           | 112 (71%)       | <0.001  |
|                                               | OSA symptoms         | 79 (39%)         | 11 (24%)           | 68 (43%)        | 0.018   |
|                                               | Daytime Sleepiness   | 71 (35%)         | 5 (11%)            | 65 (42%)        | <0.001  |
| SDS≥60 combined with OSA or insomnia symptoms |                      | 57 (29%)         | 4 (8%)             | 53 (35%)        | <0.001  |

VAS: Visual Analogue Scale, QBPDs: Quebec Back Pain Disability Scale, SDS: Zung Self-Rating Depression Scale, SAS: Zung Self-Rating Anxiety Scale.
